# Supplementary material
Source: PubMed Central journal article supplement (PMC6082401)
Supplement: NIHMS978159-supplement-1.pdf [file NIHMS978159-supplement-1.pdf]

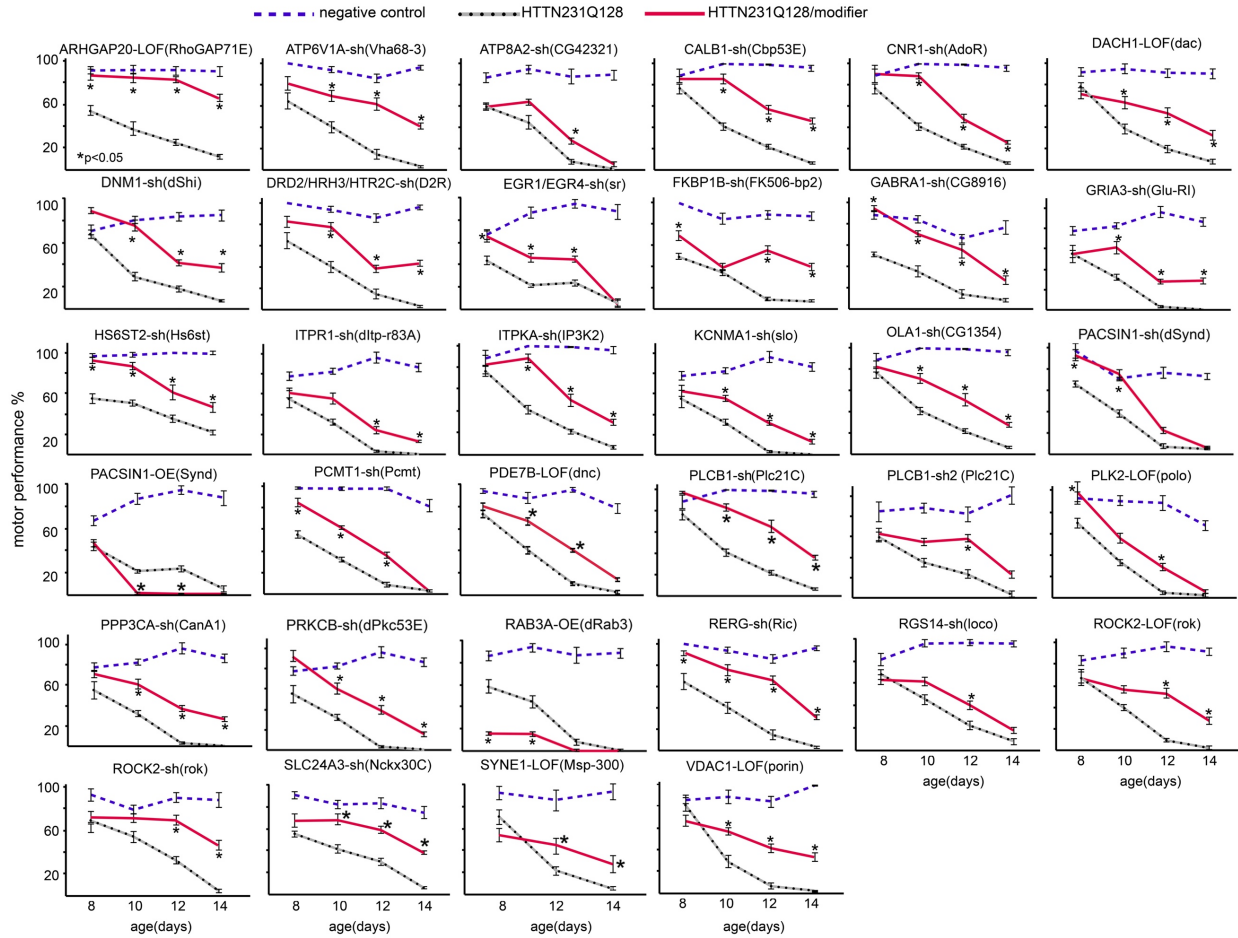

**Figure S1. *Drosophila* motor performance assay data for genes in the compensatory network.**

**Related to Figure 1.**

Charts show motor performance as a function of age in *Drosophila* negative controls (blue dashed lines,  $elav^{C155}>GAL4/w1118$ ), positive controls expressing HTTN231Q128 in the nervous system (black dotted line,  $elav^{C155}>GAL4/w1118; UAS-HTTN231Q128/+$ ) and experimental animals (red line,  $elav^{C155}>GAL4/w1118; UAS-HTTN231Q128/+; modifier/+$ ). sh: shRNA; LOF: loss of function; OE: overexpression. Error bars in motor performance charts: s.e.m. Significant differences identified using Anova followed by Tukey's post hoc test for each time point ( $\alpha=0.05$ ).

**Figure S2. *Drosophila* motor performance assay data for genes in the pathogenic networks Related to Figure 1.**

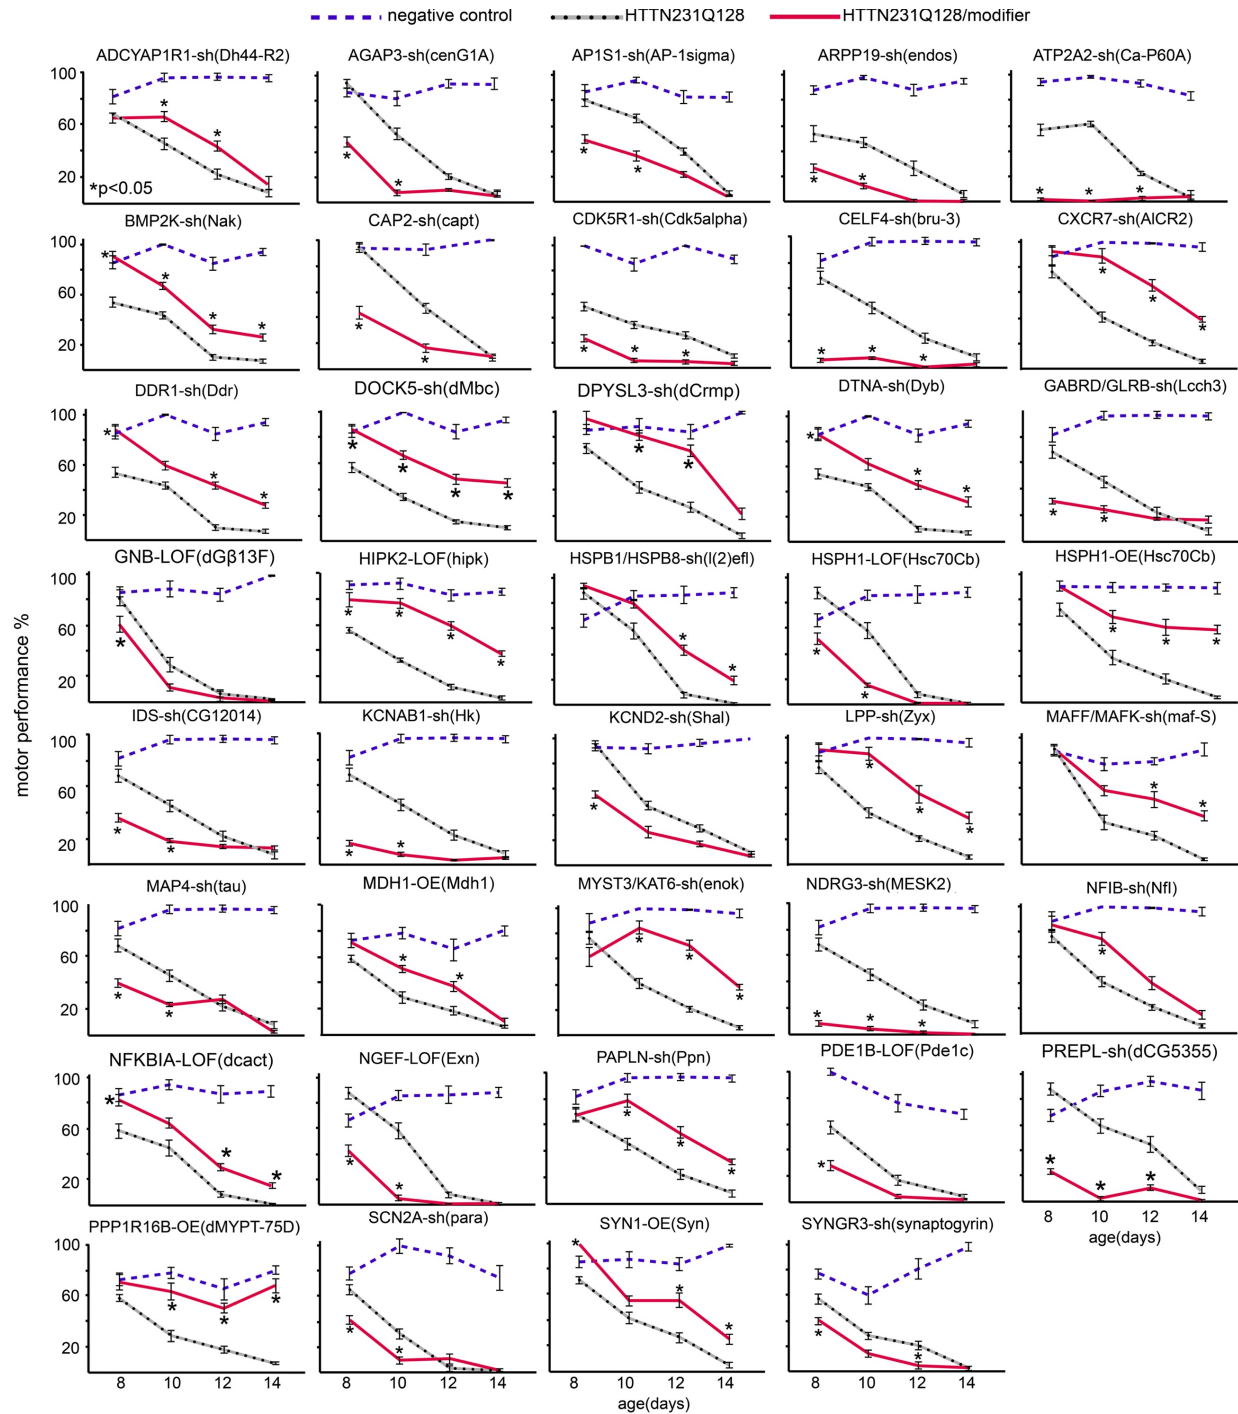

**Figure S2. *Drosophila* motor performance assay data for genes in the pathogenic networks Related to Figure 1.**

Charts show motor performance as a function of age in *Drosophila* negative controls (blue dashed lines, *elav<sup>C155</sup>>GAL4/w1118*), positive controls expressing HTT<sup>N231Q128</sup> in the nervous system (black dotted line, *elav<sup>C155</sup>>GAL4/w1118; UAS-HTT<sup>N231Q128/+</sup>*) and experimental animals (red line, *elav<sup>C155</sup>>GAL4/w1118; UAS-HTT<sup>N231Q128/+</sup>; modifier/+*). sh: shRNA; LOF: loss of function; OE: overexpression. Error bars in motor performance charts: s.e.m. Significant differences identified using Anova followed by Tukey's post hoc test for each time point ( $\alpha=0.05$ ).

**Figure S3. *Drosophila* motor performance tests for the modifier alleles of the compensatory network in control animals. Related to Figure 1.**

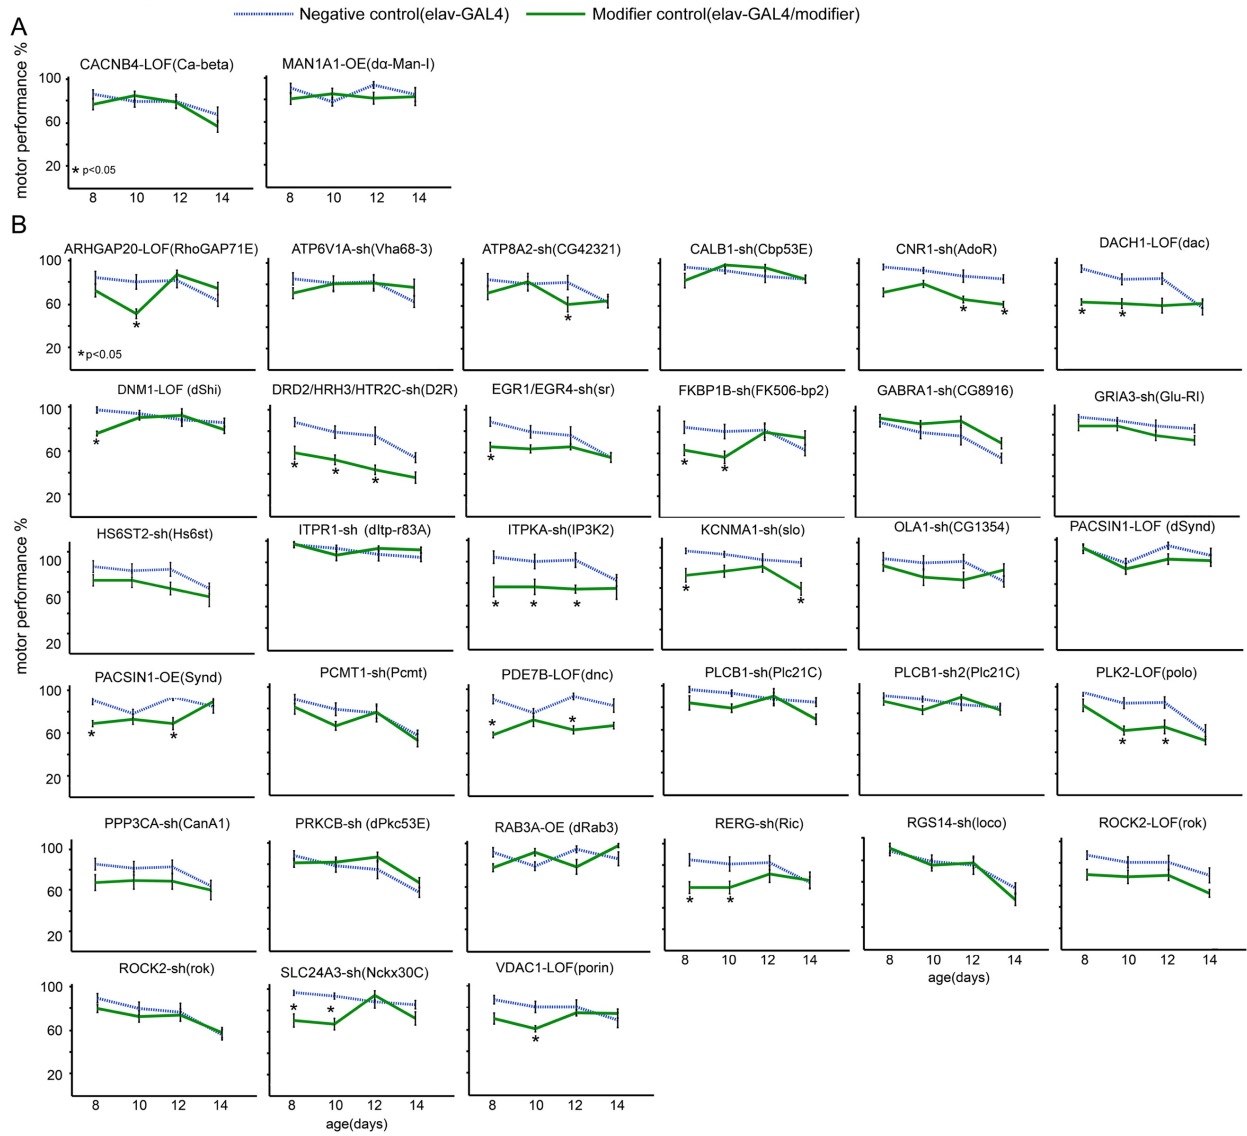

**Figure S3. *Drosophila* motor performance tests for the modifier alleles of the compensatory network in control animals. Related to Figure 1.**

Blue lines indicate the motor performance of negative controls (*elav<sup>C155</sup>/w1118*). Green line shows motor performance of animals carrying the indicated modifier alleles but not expressing HTT<sup>N231Q128</sup> (*elav<sup>C155</sup>/w1118; modifier/+*). Note that some modifiers impair the motor performance of the negative controls (*elav<sup>C155</sup>/w1118*) but these modifiers nonetheless improve the performance of HD animals (*elav<sup>C155</sup>>GAL4/w1118; UAS-HTT<sup>N231Q128</sup>/+*; see **Figure S1**). sh: shRNA; LOF: loss of function; OE: overexpression. Green error bars in gene expression scatter plots: average and standard deviation. Error bars in motor performance charts: s.e.m. Significant differences identified using Anova followed by Tukey's post hoc test for each time point ( $\alpha=0.05$ ). Panel S3A shows the control assays for the modifiers shown in Figure 1A. Panel S3B shows the control assays for the modifiers shown in Figure S1.



**Figure S4. *Drosophila* motor performance tests for the modifier alleles of the pathogenic network in control animals. Related to Figure 1.**

Blue lines indicate the motor performance of negative controls (*elav<sup>C155</sup>/w1118*). Green line shows motor performance of animals carrying the indicated modifier alleles but not expressing HTT<sup>N231Q128</sup> (*elav<sup>C155</sup>/w1118; modifier/+*). Note that some modifiers impair motor performance of both the negative controls (*elav<sup>C155</sup>/w1118*) and the HD animals (*elav<sup>C155</sup>>GAL4/w1118; UAS-HTT<sup>N231Q128</sup>/+*; see **Figure S2**); dysregulation of these genes is likely to contribute to HD pathogenesis. sh: shRNA; LOF: loss of function; OE: overexpression. Green error bars in gene expression scatter plots: average and standard deviation. Error bars in motor performance charts: s.e.m. Significant differences identified using Anova followed by Tukey's post hoc test for each time point ( $\alpha=0.05$ ). Panel S4A shows the control assays for the modifiers shown in Figure 1C. Panel S4B shows the control assays for the modifiers shown in Figure S2.

Figure S5. Pathway enrichment, additional climbing data and additional pathway analysis related to Figure 4.

A. Pathway enrichment analysis of genes in the compensatory network.

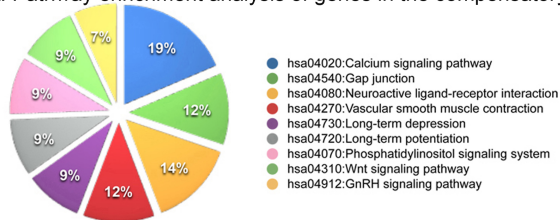

Climbing data for controls and additional modifiers shown in Figure 4.

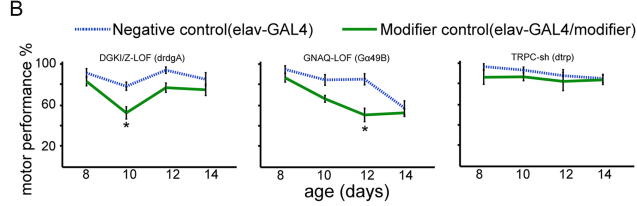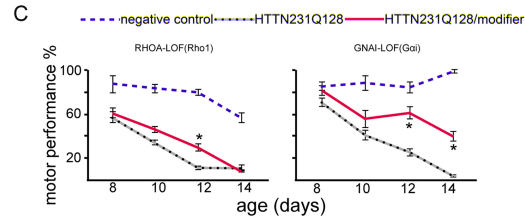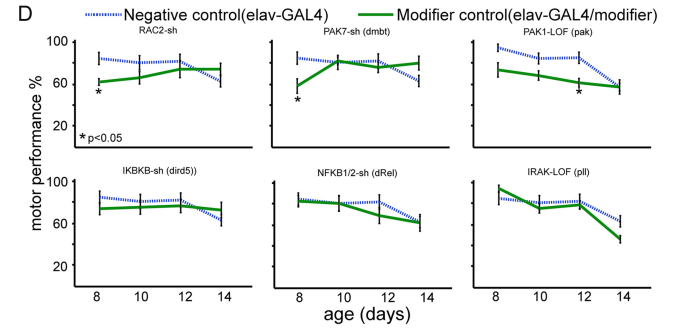

Additional network analysis of the pathogenic subnetwork reveals enrichment in genes involved in inflammation and actin cytoskeleton

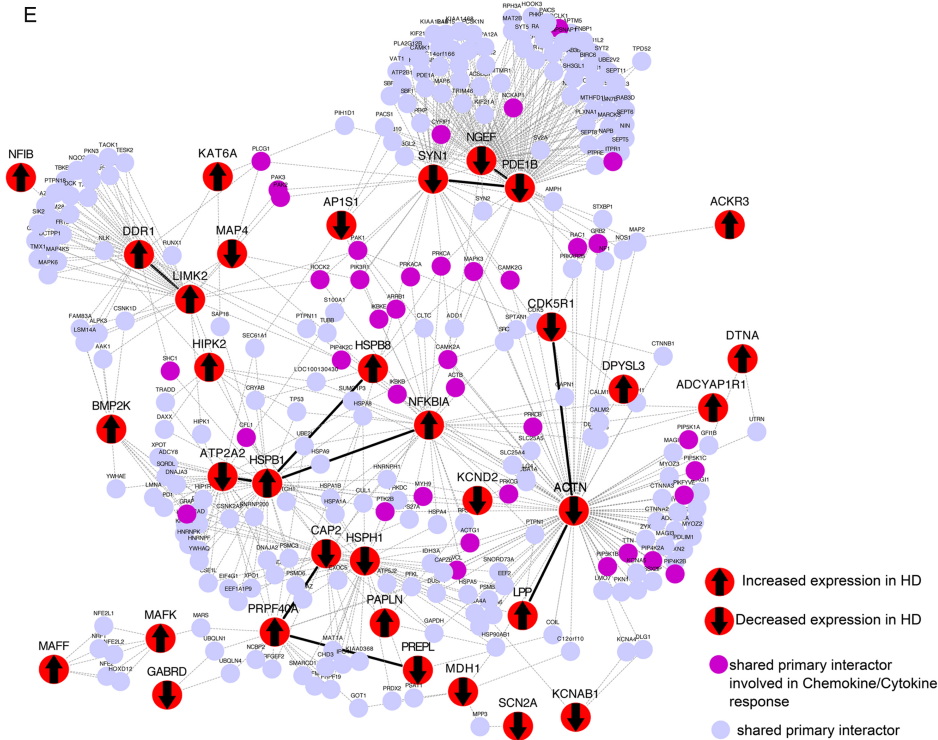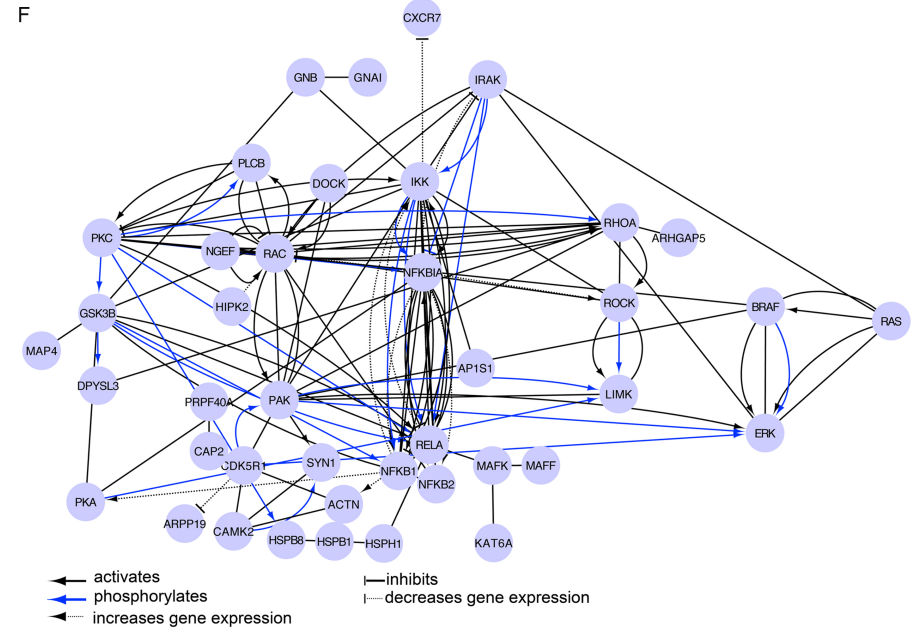



**Figure S5. Pathway enrichment, additional climbing data and additional pathway analysis related to Figure 4.**

(A) Pie chart illustrating the pathway enrichment within the compensatory category compared to the background of genes expressed in the striatum, using DAVID. The gene category most enriched is KEGG-hsa04020: “Ca<sup>2+</sup> signaling pathway” (EASE score p=9.21E-06, Benjamini 4.70E-04). (B-D) Motor performance data for controls and additional modifiers shown in Figure 4. (B and D) Green line in charts shows motor performance of animals carrying the indicated modifier allele but not expressing HTT<sup>N231Q128</sup> (*elav<sup>C155</sup>/w1118; modifier/+*) compared to *elav<sup>C155</sup>/w1118* negative controls (blue line). (C) Additional modifiers of HTT<sup>N231Q128</sup>-induced neuronal dysfunction identified through pathway expansion in the pathogenic network. sh: shRNA; LOF: loss of function; OE: overexpression. Green error bars in gene expression scatter plots: average and standard deviation. Error bars in motor performance charts: s.e.m. Significant differences identified using Anova followed by Tukey’s post hoc test for each time point ( $\alpha=0.05$ ). **Table S5** lists the specific modifier alleles identified through pathway expansion. (E-F) Additional network analysis of the pathogenic network reveals an enrichment in genes involved in inflammation and actin cytoskeleton regulation. (E) Network of genes categorized as pathogenic showing *Drosophila* modifiers altered in the human HD transcriptome (red circles with arrows) and their shared primary interactors. Note abundance of genes involved in inflammatory response and actin cytoskeleton regulation, downstream of chemokine/cytokine receptors (dark purple nodes). (F) Complete representation of all the interactions of the *Drosophila* modifier genes in the pathogenic network and their primary interacting partners generated using Ingenuity Pathway Analysis. This is the basis for the summary scheme shown in **Figure 4C**.

Figure S6 . Validation in iPS-derived neurons from HD patients. Related to Figure 5 .

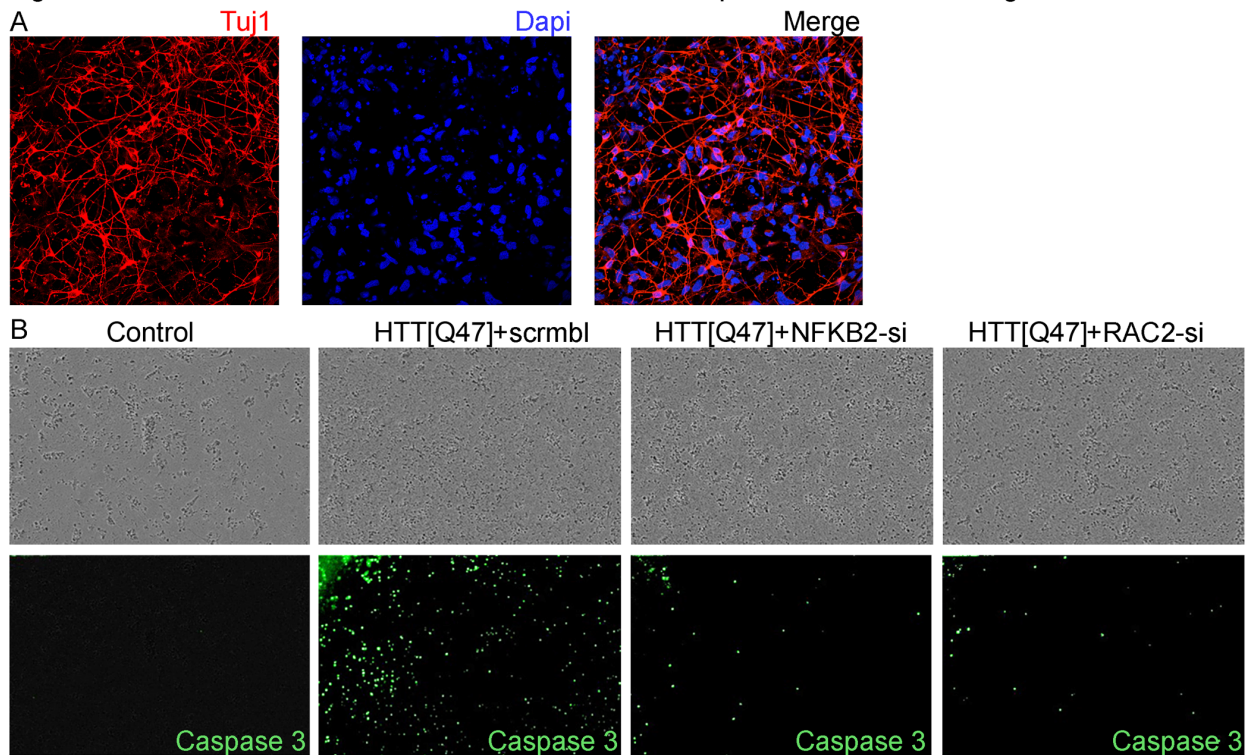

**Figure S6. Validation in iPS-derived neuron-like cells from HD patients. Related to Figure 5.**

**(A)** Immunofluorescence staining of iPS-derived cells showing positive signal for the TuJ1 neuronal marker (red), which also highlights their neuron-like morphology. **(B)** Bright field and fluorescence images of control and HTT[Q47] iPS-derived neuron-like cells transfected with a scramble, RAC2 and NFKB2 targeting siRNAs 12 hours after BDNF deprivation. Caspase-3 activation signal is shown in green.

## Supplementary Tables.

**Table S1. Genes considered for this study because their expression is altered early during human HD progression (Vonsattel grade 0-2 patients) and in at least one HD mouse model. Related to Figure 1.** For the majority of these genes (67%), the direction of the transcriptional alteration (up or down) is the same between HD patients and at least one of the mouse HD models, i.e., not all models show transcriptional change in the same direction.

**Table S2. Human genes whose expression alterations in HD we categorized as compensatory. Related to Figure 1.** Also shown: the *Drosophila* homolog, blast e-value, direction of transcriptomic change in human, class of the modifier allele and specific allele that modified the HTT<sup>N231Q128</sup>-induced behavioral deficits.

**Table S3. Human genes whose expression alterations in HD we categorized as pathogenic. Related to Figure 1.** Also shown: the *Drosophila* homolog, blast e-value, direction of transcriptomic change in human, class of the modifier allele and specific allele that modified the HTT<sup>N231Q128</sup>-induced behavioral deficits.

**Table S4. Pathways enriched in the compensatory and pathogenic networks. Related to Figure 4.** Analysis performed using primary modifier genes from the screen and shared primary protein interactors using either Inweb or STRING databases. Query performed using DAVID/KEGG databases. P-value represents EASE enrichment score.

**Table S5. Additional modifiers identified through pathway analysis. Related to Figure 4.**

**Table S6. Complete list of siRNAs used for the HTRF screen in human HD fibroblasts. Related to Figures 5 and 6.**

Table S2. Human genes whose gene expression alterations in HD are categorized as compensatory. Related to Figure 1.

| Human/<br>Mouse Gene<br>Symbol | Drosophila<br>Homologous<br>Gene | Protein Blast<br>e-value | Transcriptomic<br>change in<br>human | Allele Class | Modifier Allele          | Effect on<br><i>Drosophila</i><br>HD model | Effect of allele<br>on control<br>motor<br>performance |
|--------------------------------|----------------------------------|--------------------------|--------------------------------------|--------------|--------------------------|--------------------------------------------|--------------------------------------------------------|
| ARHGAP20                       | RhoGAP71E                        | 9E-22                    | DOWN                                 | LOF          | RhoGAP71E[j6b9]          | S                                          | N                                                      |
| ATP6V1A                        | Vha68-3                          | 0                        | DOWN                                 | shRNA*       | Vha68-3[GD11527]-v34926  | S                                          | N                                                      |
| ATP6V1A                        | Vha68-3                          | 0                        | DOWN                                 | shRNA        | Vha68-3[GD11527]-v41646  | S                                          | N                                                      |
| ATP8A2                         | CG42321                          | 0                        | DOWN                                 | LOF          | CG42321[KG03082]         | S                                          | N                                                      |
| ATP8A2                         | CG42321                          | 0                        | DOWN                                 | LOF*         | CG42321[KG05950]         | S                                          | N                                                      |
| CACNA1B                        | cac                              | 0                        | DOWN                                 | LOF*         | cac[HC129]               | S                                          | N                                                      |
| CACNB4                         | Ca-beta                          | 6E-178                   | DOWN                                 | LOF          | Ca-beta[(2)04008]        | S                                          | N                                                      |
| CALB1                          | Cbp53E                           | 1E-68                    | DOWN                                 | shRNA        | Cbp53E[GD10584]          | S                                          | N                                                      |
| CNR1                           | AdoR                             | 4E-21                    | DOWN                                 | shRNA        | AdoR[GD380]              | S                                          | I                                                      |
| DACH1                          | dac                              | 1E-54                    | DOWN                                 | LOF          | dac[9]                   | S                                          | I                                                      |
| DNM1                           | shi                              | 0                        | DOWN                                 | LOF          | shi[1]                   | S                                          | N                                                      |
| DRD2                           | D2R                              | 2E-79                    | DOWN                                 | shRNA        | D2R[GD732]               | S                                          | I                                                      |
| EGR1                           | sr                               | 1E-64                    | DOWN                                 | shRNA        | sr[KK107677]             | S                                          | N                                                      |
| EGR4                           | sr                               | 1E-46                    | DOWN                                 | shRNA        | sr[KK107677]             | S                                          | N                                                      |
| FKBP1B                         | FK506-bp2                        | 3E-54                    | DOWN                                 | shRNA*       | FK506-bp2[GD6658]-v45014 | S                                          | N                                                      |
| FKBP1B                         | FK506-bp2                        | 3E-54                    | DOWN                                 | shRNA        | FK506-bp2[GD6658]-v45015 | S                                          | N                                                      |
| GABRA1                         | CG8916                           | 4E-96                    | DOWN                                 | shRNA        | CG8916[GD3383]           | S                                          | N                                                      |
| GRIA3                          | Glu-RI                           | 0                        | DOWN                                 | shRNA        | Glu-RI[KK101533]         | S                                          | N                                                      |
| GRIA3                          | Glu-RI                           | 0                        | DOWN                                 | shRNA*       | Glu-RI[GD3582]           | S                                          | N                                                      |
| HRH3                           | D2R                              | 3E-37                    | DOWN                                 | shRNA        | D2R[GD732]               | S                                          | I                                                      |
| HS6ST2                         | Hs6st                            | 6E-108                   | DOWN                                 | shRNA        | Hs6st[KK101636]          | S                                          | N                                                      |
| HTR2C                          | D2R                              | 1E-54                    | DOWN                                 | shRNA        | D2R[GD732]               | S                                          | I                                                      |
| ITPKA                          | IP3K2                            | 7E-120                   | DOWN                                 | shRNA        | IP3K2[GD8778]            | S                                          | I                                                      |
| ITPR1                          | ltp-r83A                         | 0                        | DOWN                                 | shRNA        | ltp-r83A[GD1676]         | S                                          | N                                                      |
| KCNMA1                         | slo                              | 0                        | DOWN                                 | shRNA        | slo[GD244]               | S                                          | I                                                      |
| MAN1A1                         | alpha-Man-I                      | 0                        | DOWN                                 | OE           | alpha-Man-I[EY00697]     | E                                          | N                                                      |
| OLA1                           | CG1354                           | 4E-113                   | DOWN                                 | shRNA        | CG1354[GD8048]           | S                                          | N                                                      |
| PACSIN1                        | Synd                             | 2E-121                   | DOWN                                 | LOF          | Synd[EY07010]            | S                                          | N                                                      |
| PACSIN1                        | Synd                             | 2E-121                   | DOWN                                 | OE           | Synd[EP877]              | E                                          | N                                                      |
| PCMT1                          | Pcmt                             | 4E-83                    | DOWN                                 | shRNA        | Pcmt[GD8637]             | S                                          | N                                                      |
| PDE7B                          | dnc                              | 2E-52                    | DOWN                                 | LOF          | dnc[M14]                 | S                                          | N                                                      |
| PLCB1                          | Plc21C                           | 1E-145                   | DOWN                                 | shRNA        | Plc21C[GD11359]-v26557   | S                                          | N                                                      |
| PLCB1                          | Plc21C                           | 1E-145                   | DOWN                                 | shRNA        | Plc21C[GD11359]-v26558   | S                                          | N                                                      |
| PLK2                           | polo                             | 3E-132                   | DOWN                                 | LOF          | polo[01673]              | S                                          | I                                                      |
| PPP3CA                         | CanA1                            | 0                        | DOWN                                 | shRNA        | CanA1[GD8366]            | S                                          | N                                                      |
| PRKCB                          | Pkc53E                           | 0                        | DOWN                                 | shRNA        | Pkc53E[GD11984]          | S                                          | N                                                      |
| RAB3A                          | Rab3                             | 1E-125                   | DOWN                                 | OE           | P{UASp-YFP.Rab3.Q80L}11  | E                                          | N                                                      |
| RERG                           | Ric                              | 2E-35                    | DOWN                                 | RNAi         | Ric[GD13919]             | S                                          | I                                                      |
| RGS14                          | loco                             | 4E-37                    | DOWN                                 | shRNA        | loco[GD1282]             | S                                          | N                                                      |
| ROCK2                          | rok                              | 0                        | DOWN                                 | shRNA        | rok[GD1522]              | S                                          | N                                                      |
| ROCK2                          | rok                              | 0                        | DOWN                                 | LOF          | rok[1]                   | S                                          | N                                                      |
| SLC24A3                        | Nckx30C                          | 2E-114                   | DOWN                                 | shRNA        | Nckx30C[GD1040]          | S                                          | N                                                      |
| STXBP1                         | Rop                              | 0                        | DOWN                                 | OE*          | Rop[G4478]               | E                                          | N                                                      |
| STXBP1                         | Rop                              | 0                        | DOWN                                 | LOF*         | Rop[G27]                 | S                                          | N                                                      |
| SYNE1                          | Msp-300                          | 0                        | DOWN                                 | LOF          | Msp-300[DG03312]         | S                                          | N                                                      |
| VDAC1                          | porin                            | 5E-121                   | DOWN                                 | LOF          | porin[k05123]            | S                                          | N                                                      |

LOF: loss of function; OE: overexpression; shRNA: inducible hairpin RNAi; S: suppressor; E: enhancer; N: no effect; I: impaired; \* data not shown

Table S3. Human genes whose gene expression alterations in HD are categorized as pathogenic. Related to Figure 1.

| Human/<br>Mouse Gene<br>Symbol | Drosophila<br>Homologous<br>Gene | Protein Blast<br>e-value | Transcriptomic<br>change in<br>human | Allele Class | Modifier Allele        | Effect on<br><i>Drosophila</i> HD<br>model | Effect of allele<br>on control<br>motor<br>performance |
|--------------------------------|----------------------------------|--------------------------|--------------------------------------|--------------|------------------------|--------------------------------------------|--------------------------------------------------------|
| ACTN1                          | Actn                             | 0                        | DOWN                                 | shRNA        | Actn[GD7761]           | E                                          | I                                                      |
| ACTN2                          | Actn                             | 0                        | DOWN                                 | shRNA        | Actn[GD7761]           | E                                          | I                                                      |
| ADCYAP1R1                      | Dh44-R2                          | 2E-47                    | UP                                   | shRNA        | Dh44-R2[GD15731]       | S                                          | N                                                      |
| AGAP3                          | cenG1A                           | 8E-121                   | DOWN                                 | shRNA        | cenG1A[KK104806]       | E                                          | I                                                      |
| AP1S1                          | AP-1sigma                        | 1E-86                    | DOWN                                 | shRNA        | AP-1sigma[KK108869]    | E                                          | I                                                      |
| ARPP19                         | endos                            | 9E-20                    | DOWN                                 | shRNA        | endos[KK108642]        | E                                          | N                                                      |
| ARPP19                         | endos                            | 9E-20                    | DOWN                                 | shRNA*       | endos[GD10576]         | E                                          | N                                                      |
| ATP2A2                         | Ca-P60A                          | 0                        | DOWN                                 | shRNA        | Ca-P60A[KK107371]      | E                                          | I                                                      |
| BMP2K                          | Nak                              | 6E-136                   | UP                                   | shRNA        | Nak[GD12597]           | S                                          | N                                                      |
| CAP2                           | capt                             | 5E-134                   | DOWN                                 | shRNA        | capt[KK103925]         | E                                          | N                                                      |
| CDK5R1                         | Cdk5alpha                        | 8E-71                    | DOWN                                 | shRNA        | Cdk5alpha[KK100567]    | E                                          | N                                                      |
| CELF4                          | bru-3                            | 1E-110                   | DOWN                                 | shRNA        | bru-3[KK111663]        | E                                          | N                                                      |
| CXCR7                          | AICR2                            | 2E-32                    | UP                                   | shRNA        | AICR2[GD17055]         | S                                          | N                                                      |
| DDR1                           | Ddr                              | 8E-64                    | UP                                   | shRNA        | Ddr[GD7334]            | S                                          | N                                                      |
| DOCK5                          | mbc                              | 0                        | UP                                   | shRNA        | mbc[GD6965]            | S                                          | N                                                      |
| DPYSL3                         | CRMP                             | 0                        | UP                                   | LOF          | CRMP[sup12]            | S                                          | N                                                      |
| DPYSL3                         | CRMP                             | 0                        | UP                                   | shRNA*       | CRMP[GD4716]           | S                                          | N                                                      |
| DTNA                           | Dyb                              | 2E-137                   | UP                                   | shRNA        | Dyb[KK109268]          | S                                          | N                                                      |
| GABRD                          | Lcch3                            | 1E-98                    | DOWN                                 | shRNA        | Lcch3[KK100854]        | E                                          | I                                                      |
| GLRB                           | Lcch3                            | 2E-80                    | DOWN                                 | shRNA        | Lcch3[KK100854]        | E                                          | I                                                      |
| HIPK2                          | hipk                             | 0                        | UP                                   | LOF          | hipk[EY12599]          | S                                          | N                                                      |
| HSPB1                          | l(2)efl                          | 1E-28                    | UP                                   | shRNA        | l(2)efl[GD11341]       | S                                          | N                                                      |
| HSPB8                          | l(2)efl                          | 4E-24                    | UP                                   | shRNA        | l(2)efl[KK108279]      | S                                          | N                                                      |
| HSPB8                          | l(2)efl                          | 4E-24                    | UP                                   | shRNA        | l(2)efl[GD11341]       | S                                          | N                                                      |
| HSPH1                          | Hsc70Cb                          | 0                        | DOWN                                 | LOF          | Hsc70Cb[00082]         | E                                          | N                                                      |
| HSPH1                          | Hsc70Cb                          | 0                        | DOWN                                 | OE           | Hsc70Cb[EY00671]       | S                                          | N                                                      |
| IDS                            | CG12014                          | 6E-140                   | DOWN                                 | shRNA        | CG12014[KK101391]      | E                                          | N                                                      |
| KCNAB1                         | Hk                               | 1E-112                   | DOWN                                 | shRNA        | Hk[KK109058]           | E                                          | I                                                      |
| KCND2                          | Shal                             | 0                        | DOWN                                 | shRNA        | Shal[KK100264]         | E                                          | I                                                      |
| LIMK2                          | LIMK1                            | 2E-148                   | UP                                   | shRNA        | LIMK1[GD9586]-v25343   | S                                          | N                                                      |
| LIMK2                          | LIMK1                            | 2E-148                   | UP                                   | shRNA        | LIMK1[GD9586]-v25344   | S                                          | N                                                      |
| LPP                            | Zyx                              | 6E-92                    | UP                                   | shRNA        | Zyx[GD10696]           | S                                          | N                                                      |
| MAFF                           | maf-S                            | 1E-26                    | UP                                   | shRNA        | maf-S[KK102044]        | S                                          | N                                                      |
| MAFK                           | maf-S                            | 3E-30                    | UP                                   | shRNA        | maf-S[KK102044]        | S                                          | N                                                      |
| MAP4                           | tau                              | 8E-29                    | DOWN                                 | shRNA        | tau[KK109359]          | E                                          | I                                                      |
| MDH1                           | Mdh1                             | 6E-150                   | DOWN                                 | OE           | Mdh1[EY08761]          | S                                          | N                                                      |
| MYST3/KAT6                     | enok                             | 2E-111                   | UP                                   | shRNA        | enok[GD4037]           | S                                          | I                                                      |
| NDRG3                          | MESK2                            | 9E-79                    | DOWN                                 | shRNA        | MESK2[GD9083]          | E                                          | I                                                      |
| NFIB                           | Nfl                              | 2E-92                    | UP                                   | shRNA        | Nfl[GD4283]            | S                                          | I                                                      |
| NFKBIA                         | cact                             | 2E-35                    | UP                                   | LOF*         | cact[KG00376]          | S                                          | N                                                      |
| NFKBIA                         | cact                             | 2E-35                    | UP                                   | LOF          | cact[KG07677]          | S                                          | N                                                      |
| NGEF                           | Exn                              | 7E-76                    | DOWN                                 | LOF          | Exn[EP3042]            | E                                          | N                                                      |
| PAPLN                          | Ppn                              | 4E-89                    | UP                                   | shRNA        | Ppn[KK101228]          | S                                          | N                                                      |
| PDE1B                          | Pde1c                            | 3E-161                   | DOWN                                 | LOF          | Pde1c[c04487]*         | E                                          | N                                                      |
| PPP1R16B                       | MYPT-75D                         | 4E-102                   | DOWN                                 | OE           | UAS-MYPT-75D.HM}B9     | S                                          | I                                                      |
| PREPL                          | CG5355                           | 5E-23                    | DOWN                                 | shRNA        | CG5355[KK100768]       | E                                          | I                                                      |
| PRPF40A                        | CG3542                           | 6E-172                   | UP                                   | OE           | CG3542[EP719]          | E                                          | I                                                      |
| SCN2A                          | para                             | 0                        | DOWN                                 | shRNA        | para[GD3392]           | E                                          | I                                                      |
| SYN1                           | Syn                              | 7E-118                   | DOWN                                 | OE           | Syn[EY01930]           | S                                          | N                                                      |
| SYNGR3                         | synaptogyrin                     | 1E-41                    | DOWN                                 | shRNA        | synaptogyrin[KK108648] | E                                          | I                                                      |

LOF: loss of function; OE: overexpression; shRNA: inducible hairpin RNAi; S: suppressor; E: enhancer; N: no effect; I: impaired; \* data not shown

**Table S4. Pathways enriched in the compensatory and pathogenic networks. Related to Figure 4.**

| Compensatory |                 |                                                                          |            |       |          |           |
|--------------|-----------------|--------------------------------------------------------------------------|------------|-------|----------|-----------|
|              | David Source    | Pathway                                                                  | Gene Count | %     | P-Value  | Benjamini |
| Inweb        | KEGG_PATHWAY    | hsa04720:Long-term potentiation                                          | 4          | 44.44 | 4.45E-05 | 8.00E-04  |
|              | KEGG_PATHWAY    | hsa04070:Phosphatidylinositol signaling system                           | 4          | 44.44 | 5.74E-05 | 6.88E-04  |
|              | KEGG_PATHWAY    | hsa04020:Calcium signaling pathway                                       | 6          | 66.67 | 2.74E-07 | 9.87E-06  |
| Pathogenic   |                 |                                                                          |            |       |          |           |
|              | David Source    | Pathway                                                                  | Gene Count | %     | P-Value  | Benjamini |
| Inweb        | KEGG_PATHWAY    | Regulation of actin cytoskeleton                                         | 26         | 8.4   | 7.4E-09  | 2.9E-07   |
|              | PANTHER_PATHWAY | P00031:Inflammation mediated by chemokine and cytokine signaling pathway | 25         | 8.1   | 1.8E-03  | 3.9E-02   |
|              | KEGG_PATHWAY    | MAPK signaling pathway                                                   | 22         | 7.1   | 7.2E-05  | 5.3E-04   |
|              | KEGG_PATHWAY    | Tight junction                                                           | 21         | 6.8   | 3.7E-09  | 2.2E-07   |
|              | KEGG_PATHWAY    | Calcium signaling pathway                                                | 21         | 6.8   | 4E-07    | 6.8E-06   |
|              | KEGG_PATHWAY    | Focal adhesion                                                           | 21         | 6.8   | 3.4E-06  | 3.6E-05   |
|              | PANTHER_PATHWAY | P00005:Angiogenesis                                                      | 19         | 6.1   | 5.3E-03  | 6.6E-02   |
|              | KEGG_PATHWAY    | Pathways in cancer                                                       | 19         | 6.1   | 1.3E-02  | 4.7E-02   |
|              | KEGG_PATHWAY    | Adherens junction                                                        | 18         | 5.8   | 1.1E-10  | 1.3E-08   |
|              | KEGG_PATHWAY    | Leukocyte transendothelial migration                                     | 18         | 5.8   | 1E-07    | 2.4E-06   |
| STRING       | David Source    | Pathway                                                                  | Gene Count | %     | P-Value  | Benjamini |
|              | KEGG_PATHWAY    | Regulation of actin cytoskeleton                                         | 57         | 11    | 2.1E-23  | 9E-22     |
|              | KEGG_PATHWAY    | Focal adhesion                                                           | 56         | 10.8  | 3.9E-24  | 2.5E-22   |
|              | KEGG_PATHWAY    | Pathways in cancer                                                       | 56         | 10.8  | 1.2E-13  | 2.2E-12   |
|              | PANTHER_PATHWAY | P00031:Inflammation mediated by chemokine and cytokine signaling pathway | 52         | 10    | 3.3E-07  | 1.1E-05   |
|              | KEGG_PATHWAY    | MAPK signaling pathway                                                   | 45         | 8.7   | 8.8E-11  | 1.3E-09   |
|              | PANTHER_PATHWAY | P00034:Integrin signalling pathway                                       | 45         | 8.7   | 1E-08    | 5E-07     |
|              | KEGG_PATHWAY    | Dilated cardiomyopathy                                                   | 42         | 8.1   | 1.9E-27  | 2.5E-25   |
|              | KEGG_PATHWAY    | Chemokine signaling pathway                                              | 34         | 6.6   | 4.3E-09  | 3.1E-08   |
|              | KEGG_PATHWAY    | Hypertrophic cardiomyopathy (HCM)                                        | 32         | 6.2   | 7.3E-18  | 1.9E-16   |
| KEGG_PATHWAY | Tight junction  | 32                                                                       | 6.2        | 1E-11 | 1.7E-10  |           |

**Table S5. Additional modifiers identified through pathway analysis. Related to Figure 4.**

| Human/Mouse Gene Symbol | Drosophila Homologous Gene | Protein Blast e-value | Allele Class | Modifier Allele   |
|-------------------------|----------------------------|-----------------------|--------------|-------------------|
| GRM3                    | mGluR4                     | 0                     | shRNA        | GD707             |
| GNAQ                    | Gα49B                      | 0                     | LOF          | KG07290           |
| TRPC4/5                 | trp                        | 1.46288E-172          | shRNA        | GD372             |
| DGKI/Z                  | rdgA                       | 0                     | LOF          | EY11543           |
| IKKB                    | ird5                       | 8.11278E-47           | shRNA        | GD11248           |
| NFKB1/2                 | rel                        | 7E-56                 | shRNA        | HM05154           |
| IRAK                    | pll                        | 1.5784E-39            | LOF          | pll <sup>2</sup>  |
| PAK1                    | pak                        | 0                     | LOF          | pak <sup>11</sup> |
| PAK7                    | mbt                        | 2E-176                | shRNA        | GD9608            |
| RAC2                    | Rac2                       | 4.47228E-99           | shRNA        | GD17536           |





| Gene Symbol | siRNA       | Source    |
|-------------|-------------|-----------|
| B4GALT6     | SI03150259  | Qiagen    |
| B4GALT6     | SI04226747  | Qiagen    |
| B4GALT6     | SI04238962  | Qiagen    |
| B4GALT6     | SI04330508  | Qiagen    |
| BMP2K       | J-005071-05 | Dharmacon |
| BMP2K       | J-005071-06 | Dharmacon |
| BMP2K       | J-005071-07 | Dharmacon |
| BMP2K       | J-005071-08 | Dharmacon |
| BMP2K       | SI02224803  | Qiagen    |
| BMP2K       | SI02224810  | Qiagen    |
| BMP2K       | SI04440051  | Qiagen    |
| BMP2K       | SI04901757  | Qiagen    |
| CA11        | J-009336-09 | Dharmacon |
| CA11        | J-009336-10 | Dharmacon |
| CA11        | J-009336-11 | Dharmacon |
| CA11        | J-009336-12 | Dharmacon |
| CA11        | SI00023548  | Qiagen    |
| CA11        | SI00023555  | Qiagen    |
| CA11        | SI03047877  | Qiagen    |
| CA11        | SI03062206  | Qiagen    |
| CA12        | J-003634-06 | Dharmacon |
| CA12        | J-003634-07 | Dharmacon |
| CA12        | J-003634-08 | Dharmacon |
| CA12        | J-003634-09 | Dharmacon |
| CA12        | SI00023583  | Qiagen    |
| CA12        | SI03041913  | Qiagen    |
| CA12        | SI03106306  | Qiagen    |
| CA12        | SI03115273  | Qiagen    |
| CACNA1B     | J-006122-07 | Dharmacon |
| CACNA1B     | J-006122-08 | Dharmacon |
| CACNA1B     | J-006122-09 | Dharmacon |
| CACNA1B     | J-006122-10 | Dharmacon |
| CACNA1B     | SI00337141  | Qiagen    |
| CACNA1B     | SI00337148  | Qiagen    |
| CACNA1B     | SI00337155  | Qiagen    |
| CACNA1B     | SI00337162  | Qiagen    |
| CACNB4      | J-009062-05 | Dharmacon |
| CACNB4      | J-009062-06 | Dharmacon |
| CACNB4      | J-009062-07 | Dharmacon |
| CACNB4      | J-009062-08 | Dharmacon |
| CACNB4      | SI00014294  | Qiagen    |
| CACNB4      | SI00014308  | Qiagen    |
| CACNB4      | SI00014315  | Qiagen    |
| CACNB4      | SI03113719  | Qiagen    |
| CALB1       | J-011989-05 | Dharmacon |
| CALB1       | J-011989-06 | Dharmacon |
| CALB1       | J-011989-07 | Dharmacon |
| CALB1       | J-011989-08 | Dharmacon |
| CALB1       | SI04132933  | Qiagen    |
| CALB1       | SI04308087  | Qiagen    |
| CALB1       | SI04329143  | Qiagen    |
| CALB1       | SI04362183  | Qiagen    |
| CAP2        | J-012211-05 | Dharmacon |
| CAP2        | J-012211-06 | Dharmacon |
| CAP2        | J-012211-07 | Dharmacon |
| CAP2        | J-012211-08 | Dharmacon |
| CAP2        | SI00337939  | Qiagen    |
| CAP2        | SI04226663  | Qiagen    |
| CAP2        | SI04235490  | Qiagen    |
| CAP2        | SI04237331  | Qiagen    |
| CDHR1       | J-013677-09 | Dharmacon |
| CDHR1       | J-013677-10 | Dharmacon |
| CDHR1       | J-013677-11 | Dharmacon |
| CDHR1       | J-013677-12 | Dharmacon |
| CDHR1       | SI00678867  | Qiagen    |
| CDHR1       | SI00678874  | Qiagen    |
| CDHR1       | SI00678881  | Qiagen    |
| CDHR1       | SI00678888  | Qiagen    |
| CDK5R1      | J-008988-05 | Dharmacon |
| CDK5R1      | J-008988-06 | Dharmacon |
| CDK5R1      | J-008988-07 | Dharmacon |
| CDK5R1      | J-008988-08 | Dharmacon |
| CDK5R1      | SI00057372  | Qiagen    |
| CDK5R1      | SI00057393  | Qiagen    |
| CDK5R1      | SI02659580  | Qiagen    |
| CDK5R1      | SI04379543  | Qiagen    |
| CELFA       | J-013824-18 | Dharmacon |
| CELFA       | J-013824-19 | Dharmacon |
| CELFA       | J-013824-20 | Dharmacon |
| CELFA       | J-013824-21 | Dharmacon |
| CELFA       | SI00313621  | Qiagen    |
| CELFA       | SI00313628  | Qiagen    |
| CELFA       | SI04159463  | Qiagen    |
| CELFA       | SI04162179  | Qiagen    |
| CH3L1       | J-012568-09 | Dharmacon |
| CH3L1       | J-012568-10 | Dharmacon |
| CH3L1       | J-012568-11 | Dharmacon |
| CH3L1       | J-012568-12 | Dharmacon |
| CH3L1       | SI00345821  | Qiagen    |
| CH3L1       | SI00345842  | Qiagen    |
| CH3L1       | SI03125227  | Qiagen    |
| CH3L1       | SI04254187  | Qiagen    |
| CLMN        | J-017131-18 | Dharmacon |
| CLMN        | J-017131-19 | Dharmacon |
| CLMN        | J-017131-20 | Dharmacon |
| CLMN        | J-017131-21 | Dharmacon |
| CLMN        | SI00348418  | Qiagen    |
| CLMN        | SI04201498  | Qiagen    |
| CLMN        | SI04256875  | Qiagen    |
| CLMN        | SI04320848  | Qiagen    |
| CNR1        | J-004711-09 | Dharmacon |
| CNR1        | J-004711-10 | Dharmacon |
| CNR1        | J-004711-12 | Dharmacon |
| CNR1        | SI00113162  | Qiagen    |
| CNR1        | SI00113169  | Qiagen    |
| CNR1        | SI00113176  | Qiagen    |
| CNR1        | SI00113183  | Qiagen    |
| CORO1C      | J-017331-05 | Dharmacon |
| CORO1C      | J-017331-06 | Dharmacon |
| CORO1C      | J-017331-07 | Dharmacon |
| CORO1C      | J-017331-08 | Dharmacon |
| CORO1C      | SI00351918  | Qiagen    |

| Gene Symbol | siRNA       | Source    |
|-------------|-------------|-----------|
| GABRD       | J-006171-08 | Dharmacon |
| GABRD       | SI00016233  | Qiagen    |
| GABRD       | SI00016240  | Qiagen    |
| GABRD       | SI00016247  | Qiagen    |
| GADP1       | SI00016254  | Qiagen    |
| GADP1       | J-021225-05 | Dharmacon |
| GADP1       | J-021225-06 | Dharmacon |
| GADP1       | J-021225-07 | Dharmacon |
| GADP1       | J-021225-08 | Dharmacon |
| GADP1       | J-021225-09 | Dharmacon |
| GADP1       | J-021225-10 | Dharmacon |
| GADP1       | SI00123445  | Qiagen    |
| GADP1       | SI00123466  | Qiagen    |
| GADP1       | SI02777831  | Qiagen    |
| GADP1       | SI02777838  | Qiagen    |
| GLRB        | J-006183-05 | Dharmacon |
| GLRB        | J-006183-06 | Dharmacon |
| GLRB        | J-006183-07 | Dharmacon |
| GLRB        | J-006183-08 | Dharmacon |
| GLRB        | J-006183-09 | Dharmacon |
| GLRB        | SI00016436  | Qiagen    |
| GLRB        | SI00016443  | Qiagen    |
| GLRB        | SI00016450  | Qiagen    |
| GLRB        | SI03077263  | Qiagen    |
| GNB5        | J-017235-05 | Dharmacon |
| GNB5        | J-017235-06 | Dharmacon |
| GNB5        | J-017235-07 | Dharmacon |
| GNB5        | J-017235-08 | Dharmacon |
| GNB5        | J-017235-09 | Dharmacon |
| GNB5        | J-017235-10 | Dharmacon |
| GNB5        | SI02637607  | Qiagen    |
| GNB5        | SI03025876  | Qiagen    |
| GNB5        | SI03049242  | Qiagen    |
| GNB5        | SI03073973  | Qiagen    |
| GPR155      | J-005494-05 | Dharmacon |
| GPR155      | J-005494-06 | Dharmacon |
| GPR155      | J-005494-08 | Dharmacon |
| GPR155      | SI04903682  | Qiagen    |
| GPR155      | SI04903689  | Qiagen    |
| GPR155      | SI04903696  | Qiagen    |
| GPR155      | SI04903703  | Qiagen    |
| GRIA3       | J-006186-07 | Dharmacon |
| GRIA3       | J-006186-08 | Dharmacon |
| GRIA3       | J-006186-09 | Dharmacon |
| GRIA3       | J-006186-10 | Dharmacon |
| GRIA3       | SI00016541  | Qiagen    |
| GRIA3       | SI03043642  | Qiagen    |
| GRIA3       | SI03046967  | Qiagen    |
| GRIA3       | SI03111024  | Qiagen    |
| HIPK2       | J-003266-10 | Dharmacon |
| HIPK2       | J-003266-11 | Dharmacon |
| HIPK2       | J-003266-12 | Dharmacon |
| HIPK2       | SI00134330  | Qiagen    |
| HIPK2       | SI00134337  | Qiagen    |
| HIPK2       | SI04439386  | Qiagen    |
| HIPK2       | SI04439393  | Qiagen    |
| HS6ST2      | J-015558-05 | Dharmacon |
| HS6ST2      | J-015558-06 | Dharmacon |
| HS6ST2      | J-015558-07 | Dharmacon |
| HS6ST2      | J-015558-08 | Dharmacon |
| HS6ST2      | J-015558-09 | Dharmacon |
| HS6ST2      | SI04145414  | Qiagen    |
| HS6ST2      | SI04269020  | Qiagen    |
| HS6ST2      | SI04296208  | Qiagen    |
| HS6ST2      | SI04335051  | Qiagen    |
| HSPB1       | J-005269-06 | Dharmacon |
| HSPB1       | J-005269-07 | Dharmacon |
| HSPB1       | J-005269-08 | Dharmacon |
| HSPB1       | J-005269-09 | Dharmacon |
| HSPB1       | SI02650585  | Qiagen    |
| HSPB1       | SI02650606  | Qiagen    |
| HSPB1       | SI04231129  | Qiagen    |
| HSPB1       | SI04354490  | Qiagen    |
| HSPB8       | J-005006-05 | Dharmacon |
| HSPB8       | J-005006-06 | Dharmacon |
| HSPB8       | J-005006-07 | Dharmacon |
| HSPB8       | J-005006-08 | Dharmacon |
| HSPB8       | J-005006-09 | Dharmacon |
| HSPB8       | SI02224502  | Qiagen    |
| HSPB8       | SI03021921  | Qiagen    |
| HSPB8       | SI03100083  | Qiagen    |
| HSPB8       | SI04900854  | Qiagen    |
| HSPH1       | J-004972-05 | Dharmacon |
| HSPH1       | J-004972-06 | Dharmacon |
| HSPH1       | J-004972-07 | Dharmacon |
| HSPH1       | J-004972-08 | Dharmacon |
| HSPH1       | J-004972-09 | Dharmacon |
| HSPH1       | SI03158281  | Qiagen    |
| HSPH1       | SI04159764  | Qiagen    |
| HSPH1       | SI04314905  | Qiagen    |
| HSPH1       | SI04367643  | Qiagen    |
| HTR2C       | J-005640-05 | Dharmacon |
| HTR2C       | J-005640-06 | Dharmacon |
| HTR2C       | J-005640-07 | Dharmacon |
| HTR2C       | J-005640-08 | Dharmacon |
| HTR2C       | J-005640-09 | Dharmacon |
| HTR2C       | SI00017367  | Qiagen    |
| HTR2C       | SI00017374  | Qiagen    |
| HTR2C       | SI03083164  | Qiagen    |
| HTR2C       | SI04896927  | Qiagen    |
| IDS         | J-009254-05 | Dharmacon |
| IDS         | J-009254-06 | Dharmacon |
| IDS         | J-009254-07 | Dharmacon |
| IDS         | J-009254-08 | Dharmacon |
| IDS         | J-009254-09 | Dharmacon |
| IDS         | SI00004368  | Qiagen    |
| IDS         | SI03033149  | Qiagen    |
| IDS         | SI03054345  | Qiagen    |
| IDS         | SI03098753  | Qiagen    |
| IGDCC4      | J-014170-09 | Dharmacon |
| IGDCC4      | J-014170-10 | Dharmacon |
| IGDCC4      | J-014170-11 | Dharmacon |
| IGDCC4      | J-014170-12 | Dharmacon |
| IGDCC4      | SI00660380  | Qiagen    |
| IGDCC4      | SI04181996  | Qiagen    |
| IGDCC4      | SI04242833  | Qiagen    |
| IGDCC4      | SI04275558  | Qiagen    |
| IKBKAP      | J-009371-05 | Dharmacon |
| IKBKAP      | J-009371-06 | Dharmacon |
| IKBKAP      | J-009371-07 | Dharmacon |
| IKBKAP      | J-009371-08 | Dharmacon |

| Gene Symbol | siRNA       | Source    |
|-------------|-------------|-----------|
| LIX1        | SI04318069  | Qiagen    |
| LIX1        | SI04335863  | Qiagen    |
| LPP         | J-020012-05 | Dharmacon |
| LPP         | J-020012-06 | Dharmacon |
| LPP         | J-020012-07 | Dharmacon |
| LPP         | J-020012-08 | Dharmacon |
| LPP         | SI00623119  | Qiagen    |
| LPP         | SI03687439  | Qiagen    |
| LPP         | SI04173659  | Qiagen    |
| LPP         | SI04264022  | Qiagen    |
| LPP         | SI04300114  | Qiagen    |
| LPP         | SI04371129  | Qiagen    |
| LRIG1       | J-013940-05 | Dharmacon |
| LRIG1       | J-013940-06 | Dharmacon |
| LRIG1       | J-013940-07 | Dharmacon |
| LRIG1       | J-013940-08 | Dharmacon |
| LRIG1       | SI04295767  | Qiagen    |
| LRIG1       | SI04316767  | Qiagen    |
| LRIG1       | SI04341022  | Qiagen    |
| LRIG1       | SI04363667  | Qiagen    |
| LTBP3       | J-014144-05 | Dharmacon |
| LTBP3       | J-014144-06 | Dharmacon |
| LTBP3       | J-014144-07 | Dharmacon |
| LTBP3       | J-014144-08 | Dharmacon |
| LTBP3       | SI00625121  | Qiagen    |
| LTBP3       | SI04204613  | Qiagen    |
| LTBP3       | SI04274158  | Qiagen    |
| LTBP3       | SI04285505  | Qiagen    |
| MAFF        | J-003903-05 | Dharmacon |
| MAFF        | J-003903-06 | Dharmacon |
| MAFF        | J-003903-07 | Dharmacon |
| MAFF        | J-003903-08 | Dharmacon |
| MAFF        | SI02662058  | Qiagen    |
| MAFF        | SI03026611  | Qiagen    |
| MAFF        | SI03067372  | Qiagen    |
| MAFF        | SI03116456  | Qiagen    |
| MAFK        | J-008580-05 | Dharmacon |
| MAFK        | J-008580-06 | Dharmacon |
| MAFK        | J-008580-07 | Dharmacon |
| MAFK        | J-008580-08 | Dharmacon |
| MAFK        | SI00036715  | Qiagen    |
| MAFK        | SI02628416  | Qiagen    |
| MAFK        | SI02628423  | Qiagen    |
| MAFK        | SI02628430  | Qiagen    |
| MAN1A1      | J-012174-05 | Dharmacon |
| MAN1A1      | J-012174-06 | Dharmacon |
| MAN1A1      | J-012174-07 | Dharmacon |
| MAN1A1      | J-012174-08 | Dharmacon |
| MAN1A1      | SI04172826  | Qiagen    |
| MAN1A1      | SI04273689  | Qiagen    |
| MAN1A1      | SI04341316  | Qiagen    |
| MAN1A1      | SI04364815  | Qiagen    |
| MAPA        | SI03153612  | Qiagen    |
| MAPA        | SI04239214  | Qiagen    |
| MAPA        | SI04315731  | Qiagen    |
| MAPA        | SI04337053  | Qiagen    |
| MDH1        | J-009264-09 | Dharmacon |
| MDH1        | J-009264-10 | Dharmacon |
| MDH1        | J-009264-11 | Dharmacon |
| MDH1        | J-009264-12 | Dharmacon |
| MDH1        | SI00082649  | Qiagen    |
| MDH1        | SI00082656  | Qiagen    |
| MDH1        | SI00082663  | Qiagen    |
| MDH1        | SI03092761  | Qiagen    |
| MYLK        | J-005351-18 | Dharmacon |
| MYLK        | J-005351-19 | Dharmacon |
| MYLK        | J-005351-20 | Dharmacon |
| MYLK        | J-005351-21 | Dharmacon |
| MYLK        | SI00083202  | Qiagen    |
| MYLK        | SI00083209  | Qiagen    |
| MYLK        | SI02224040  | Qiagen    |
| MYLK        | SI03067960  | Qiagen    |
| MYST3       | J-019849-05 | Dharmacon |
| MYST3       | J-019849-06 | Dharmacon |
| MYST3       | J-019849-07 | Dharmacon |
| MYST3       | J-019849-08 | Dharmacon |
| MYST3       | SI00091714  | Qiagen    |
| MYST3       | SI03020836  | Qiagen    |
| MYST3       | SI04388293  | Qiagen    |
| MYST3       | SI04388300  | Qiagen    |
| MYST3       | J-012835-18 | Dharmacon |
| MYST3       | J-012835-19 | Dharmacon |
| MYST3       | J-012835-20 | Dharmacon |
| MYST3       | J-012835-21 | Dharmacon |
| MYST3       | SI00655683  | Qiagen    |
| MYST3       | SI00655690  | Qiagen    |
| MYST3       | SI04227167  | Qiagen    |
| MYST3       | SI04282285  | Qiagen    |
| NDRG3       | J-013533-09 | Dharmacon |
| NDRG3       | J-013533-10 | Dharmacon |
| NDRG3       | J-013533-11 | Dharmacon |
| NDRG3       | J-013533-12 | Dharmacon |
| NDRG3       | SI00656124  | Qiagen    |
| NDRG3       | SI04152099  | Qiagen    |
| NDRG3       | SI04222645  | Qiagen    |
| NDRG3       | SI04322192  | Qiagen    |
| NECAP1      | J-017872-09 | Dharmacon |
| NECAP1      | J-017872-10 | Dharmacon |
| NECAP1      | J-017872-11 | Dharmacon |
| NECAP1      | J-017872-12 | Dharmacon |
| NECAP1      | SI04155732  | Qiagen    |
| NECAP1      | SI04159008  | Qiagen    |
| NECAP1      | SI04334869  | Qiagen    |
| NECAP1      | SI04358333  | Qiagen    |
| NEK7        | J-003795-11 | Dharmacon |
| NEK7        | J-003795-12 | Dharmacon |
| NEK7        | J-003795-13 | Dharmacon |
| NEK7        | J-003795-14 | Dharmacon |
| NEK7        | SI00287966  | Qiagen    |
| NEK7        | SI04903552  | Qiagen    |
| NEK7        | SI04903542  | Qiagen    |
| NELL2       | J-012185-09 | Dharmacon |

| Gene Symbol | siRNA       | Source    |
|-------------|-------------|-----------|
| PLK2        | J-003325-20 | Dharmacon |
| PLK2        | J-003325-21 | Dharmacon |
| PLK2        | SI00090363  | Qiagen    |
| PLK2        | SI00288386  | Qiagen    |
| PLK2        | SI04438770  | Qiagen    |
| PLK2        | SI04438777  | Qiagen    |
| PPP         |             |           |

| Gene Symbol | siRNA       | Source    |
|-------------|-------------|-----------|
| CORO1C      | SI03168578  | Qiagen    |
| CORO1C      | SI04138631  | Qiagen    |
| CORO1C      | SI04310481  | Qiagen    |
| CRISPLD1    | J-016681-17 | Dharmacon |
| CRISPLD1    | J-016681-18 | Dharmacon |
| CRISPLD1    | J-016681-19 | Dharmacon |
| CRISPLD1    | J-016681-20 | Dharmacon |
| CRISPLD1    | SI04179049  | Qiagen    |
| CRISPLD1    | SI04248986  | Qiagen    |
| CRISPLD1    | SI04295774  | Qiagen    |
| CRISPLD1    | SI04339370  | Qiagen    |
| CXCR7       | J-013212-10 | Dharmacon |
| CXCR7       | J-013212-11 | Dharmacon |
| CXCR7       | J-013212-12 | Dharmacon |
| CXCR7       | J-013212-13 | Dharmacon |
| CXCR7       | SI00125790  | Qiagen    |
| CXCR7       | SI02660644  | Qiagen    |
| CXCR7       | SI04901925  | Qiagen    |
| CXCR7       | SI04901932  | Qiagen    |
| DACH1       | J-013222-05 | Dharmacon |
| DACH1       | J-013222-06 | Dharmacon |
| DACH1       | J-013222-07 | Dharmacon |
| DACH1       | J-013222-08 | Dharmacon |
| DACH1       | J-013222-09 | Dharmacon |
| DACH1       | SI00359212  | Qiagen    |
| DACH1       | SI03649107  | Qiagen    |
| DACH1       | SI04175073  | Qiagen    |
| DACH1       | SI04200553  | Qiagen    |
| DACH1       | SI04238255  | Qiagen    |
| DDR1        | J-003111-12 | Dharmacon |
| DDR1        | J-003111-13 | Dharmacon |
| DDR1        | J-003111-14 | Dharmacon |
| DDR1        | J-003111-15 | Dharmacon |

| Gene Symbol | siRNA       | Source    |
|-------------|-------------|-----------|
| IKBKAP      | SI00287462  | Qiagen    |
| IKBKAP      | SI03045749  | Qiagen    |
| IKBKAP      | SI04899181  | Qiagen    |
| IKBKAP      | SI04899188  | Qiagen    |
| IKBKB       | J-003503-11 | Dharmacon |
| IKBKB       | J-003503-12 | Dharmacon |
| IKBKB       | J-003503-13 | Dharmacon |
| IKBKB       | J-003503-14 | Dharmacon |
| IKBKB       | SI00300545  | Qiagen    |
| IKBKB       | SI02626442  | Qiagen    |
| IKBKB       | SI02626456  | Qiagen    |
| IKBKB       | SI02777376  | Qiagen    |
| IKBKE       | J-003723-09 | Dharmacon |
| IKBKE       | J-003723-10 | Dharmacon |
| IKBKE       | J-003723-11 | Dharmacon |

| Gene Symbol | siRNA       | Source    |
|-------------|-------------|-----------|
| NELL2       | J-012185-10 | Dharmacon |
| NELL2       | J-012185-11 | Dharmacon |
| NELL2       | J-012185-12 | Dharmacon |
| NELL2       | SI04167205  | Qiagen    |
| NELL2       | SI04205565  | Qiagen    |
| NELL2       | SI04292183  | Qiagen    |
| NELL2       | SI04352901  | Qiagen    |
| NFIB        | J-008456-05 | Dharmacon |
| NFIB        | J-008456-06 | Dharmacon |
| NFIB        | J-008456-07 | Dharmacon |
| NFIB        | J-008456-08 | Dharmacon |
| NFIB        | SI00079352  | Qiagen    |
| NFIB        | SI00079359  | Qiagen    |
| NFIB        | SI03032197  | Qiagen    |
| NFIB        | SI03101140  | Qiagen    |
| NFIB        | SI04300947  | Qiagen    |
| NFKB1       | J-003520-06 | Dharmacon |
| NFKB1       | J-003520-07 | Dharmacon |
| NFKB1       | J-003520-08 | Dharmacon |
| NFKB1       | J-003520-09 | Dharmacon |
| NFKB1       | SI02654932  | Qiagen    |
| NFKB1       | SI02654939  | Qiagen    |
| NFKB1       | SI02662618  | Qiagen    |
| NFKB2       | J-003918-05 | Dharmacon |
| NFKB2       | J-003918-06 | Dharmacon |
| NFKB2       | J-003918-07 | Dharmacon |
| NFKB2       | J-003918-08 | Dharmacon |
| NFKB2       | SI00300965  | Qiagen    |
| NFKB2       | SI02650949  | Qiagen    |
| NFKB2       | SI04219852  | Qiagen    |
| NFKB2       | SI04224290  | Qiagen    |
| NFKB2       | SI04245318  | Qiagen    |

| Gene Symbol | siRNA       | Source    |
|-------------|-------------|-----------|
| RERG        | SI03068107  | Qiagen    |
| RGS14       | J-008826-05 | Dharmacon |
| RGS14       | J-008826-06 | Dharmacon |
| RGS14       | J-008826-07 | Dharmacon |
| RGS14       | J-008826-08 | Dharmacon |
| RGS14       | J-022559-18 | Dharmacon |
| RGS14       | SI00088879  | Qiagen    |
| RGS14       | SI00088886  | Qiagen    |
| RGS14       | SI03054737  | Qiagen    |
| RGS14       | SI03076367  | Qiagen    |
| ROCK1       | J-003536-06 | Dharmacon |
| ROCK1       | J-003536-07 | Dharmacon |
| ROCK1       | J-003536-08 | Dharmacon |
| ROCK1       | J-003536-09 | Dharmacon |
| ROCK1       | SI02622095  | Qiagen    |
| ROCK1       | SI02622102  | Qiagen    |
| ROCK1       | SI03095484  | Qiagen    |
| ROCK1       | SI04898362  | Qiagen    |
| ROCK2       | J-004610-06 | Dharmacon |
| ROCK2       | J-004610-07 | Dharmacon |
| ROCK2       | J-004610-08 | Dharmacon |
| ROCK2       | J-004610-09 | Dharmacon |
| ROCK2       | SI02223753  | Qiagen    |
| ROCK2       | SI04899720  | Qiagen    |
| ROCK2       | SI04899727  | Qiagen    |
| TBK1        | J-003788-08 | Dharmacon |
| TBK1        | J-003788-09 | Dharmacon |
| TBK1        | J-003788-10 | Dharmacon |
| TBK1        | J-003788-11 | Dharmacon |
| TBK1        | SI00100961  | Qiagen    |
| TBK1        | SI02224411  | Qiagen    |
| TBK1        | SI04379606  | Qiagen    |
| TBK1        | SI04901169  | Qiagen    |
